# Supplementary material for: Studying copper(ii) ion induced interactions of β-amyloid peptides within living cells by gold nanoparticle probes
Source: Royal Society of Chemistry journal article supplement (doi:10.1039/c0ay00438c), 2010-01-01
Supplement: c0ay00438c.pdf [file c0ay00438c.pdf]

Electronic Supplementary Information (ESI) for:

## **Studying copper (II) ion induced interactions of $\beta$ -amyloid peptides with living cells by gold nanoparticle probes**

**Chengke Wang,<sup>ab</sup> Jine Wang,<sup>ab</sup> Dianjun Liu<sup>a</sup> and Zhenxin Wang<sup>a\*</sup>**

a. State Key Laboratory of Electroanalytical Chemistry, Changchun Institute of Applied Chemistry, Chinese Academy of Sciences, Changchun, China, 130022.

b. Graduate School of the Chinese Academy of Sciences, Beijing, China, 100039.

Corresponding author.

\*E-mail: wangzx@ciac.jl.cn; Tel: (+86) 431-85262243; Fax :(+86) 431-85262243.

**Additional Figure 1 and 2**

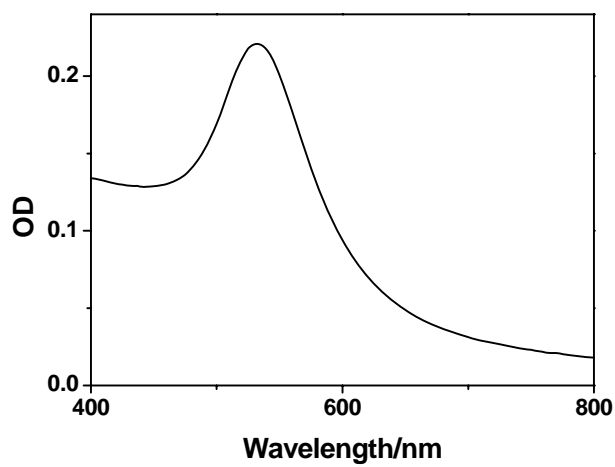

Figure 1. The UV-visible spectrum of the streptavidin-GNPs. The maximum absorption wavelength of the particle is 528 nm.

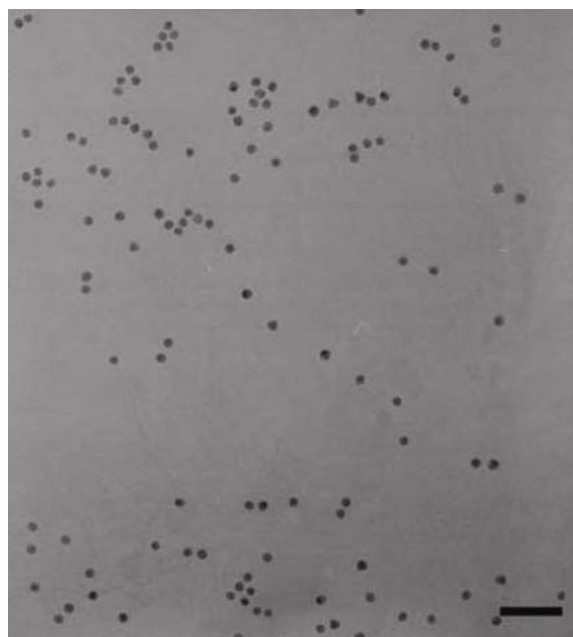

Figure 2 TEM micrograph of streptavidin-GNPs. The average size of the particles is  $13 \pm 0.75$  nm in diameter. The scale bar indicates 100 nm.
